# Supplementary material for: Silk Fibroin Bioink for 3D Printing in Tissue Regeneration: Controlled Release of MSC extracellular Vesicles
Source: MDPI journal article supplement (doi:10.3390/pharmaceutics15020383), 2023-01-22
Supplement: s1 [file s1]

# Silk Fibroin Bioink for 3D Printing in Tissue Regeneration: Controlled Release of MSC-Extracellular Vesicles

Elia Bari, Giulia Maria Di Gravina, Franca Scocozza, Sara Perteghella, Benedetta Frongia, Sara Tengattini, Lorena Segale, Maria Luisa Torre and Michele Conti

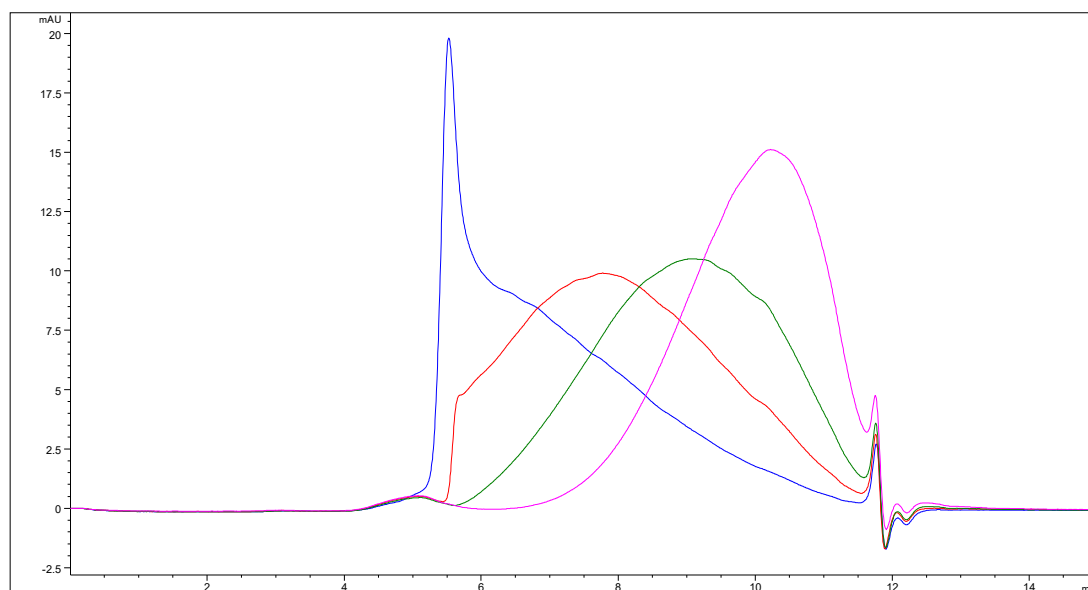

**Figure S1.** SEC-UV profile of SF degummed for 30 min (blue trace), 1 h (red trace), 2 h (green trace) and 4 h (pink trace).
